# Supplementary material for: Prior Appendectomy and the Onset and Course of Crohn's Disease in Chinese Patients
Source: Gastroenterol Res Pract. 2019 Jul 17;2019:8463926. doi: 10.1155/2019/8463926 (PMC6664542; doi:10.1155/2019/8463926)
Supplement: Supplementary Materials — The data of the controls and the data of Crohn's disease patients. [file 8463926.f1.zip]

Archive with 2 entries (2 files):
- 8463926.f1.xlsx
- 8463926.f2.xlsx
