# Supplementary material for: Prior Appendectomy and the Onset and Course of Crohn's Disease in Chinese Patients
Source: Gastroenterol Res Pract. 2019 Jul 17;2019:8463926. doi: 10.1155/2019/8463926 (PMC6664542; doi:10.1155/2019/8463926)
Supplement: Supplementary Materials — The data of the controls and the data of Crohn's disease patients. [file 8463926.f1.zip › 8463926.f1.xlsx]

## Sheet: Sheet1
Serial number	Sex(1=Male,2=Female)	Age of CD diagnosis (years)	Disease duration (months)	Nationality (1=Han nationality,2=Minority)	Smoker(1=Yes,2=No)	Drinker(1=Yes,2=No)	NSAIDs (1=Yes,2=No)	Appendectomy (1=Yes,2=No)	Appendectomy of control(1=Yes,2=No)	Interval between appendectomy and CD diagnosis (years)	Age at appendectomy (years)	Location of disease (1=Terminal ileum,2=Colon,3=Ileocolon)	Behavior of disease (1=Nonstricturing, non-penetrating,2=Stricturing,3=Penetrating)	Perianal disease (1=Yes,2=No)	steroid(1=Yes,2=No)	Immunosuppressant (1=Yes,2=No)	Anti-TNF agents (1=Yes,2=No)	Intestinal resection (1=Yes,2=No)
1	2	39	18	1	1	2	2	2	2			3	2	2	2	2	2	2
2	1	57	132	1	2	2	2	2	2			2	2	2	1	1	2	1
3	1	21	15	1	2	2	2	2	1			1	3	2	1	2	2	2
4	1	60	156	1	1	2	1	2	2			3	2	2	2	2	2	2
5	1	22	36	1	1	2	2	2	2			1	1	2	1	1	2	2
6	1	35	48	1	2	2	2	2	2			1	1	2	1	1	2	2
7	2	12	48	1	2	2	2	2	2			3	1	1	2	2	1	2
8	1	37	12	1	1	2	2	2	1			1	1	2	1	2	2	2
9	2	21	12	1	1	2	2	2	1			1	2	1	1	2	2	1
10	1	29	12	1	2	2	2	2	2			3	3	2	2	2	2	2
11	2	37	60	1	2	2	2	2	1			1	1	1	1	2	2	2
12	1	33	48	1	1	1	2	2	2			3	1	2	1	1	2	2
13	2	6	12	1	2	2	2	2	2			2	2	2	1	1	1	1
14	1	26	48	1	2	2	2	2	2			3	2	2	2	1	2	2
15	2	21	12	1	1	2	2	2	2			1	1	2	1	1	2	2
16	1	36	12	1	2	2	2	2	2			1	1	1	2	2	1	1
17	1	34	24	1	1	2	2	1	2	18	16	1	2	2	1	1	2	1
18	1	61	48	1	1	1	2	2	2			1	1	2	2	2	2	2
19	2	27	10	1	2	2	2	2	2			3	2	2	2	2	2	2
20	2	24	12	1	2	2	2	2	2			3	1	2	2	2	2	2
21	2	19	24	1	2	2	2	2	2			3	3	1	2	1	2	1
22	1	16	48	1	2	1	2	2	1			3	2	2	2	2	2	2
23	2	25	84	1	1	2	2	2	2			2	1	2	1	1	2	2
24	1	71	44	1	2	2	2	2	2			2	1	2	1	2	2	2
25	1	52	80	1	2	2	2	2	2			1	2	2	1	2	2	2
26	1	42	48	1	1	1	2	2	2			1	1	2	1	1	2	2
27	1	30	46	1	2	2	2	2	2			3	1	2	2	1	2	2
28	1	15	60	1	2	1	2	2	2			2	1	1	2	2	1	2
29	1	23	44	1	2	2	2	2	2			3	3	2	2	2	2	1
30	1	15	12	1	2	2	2	2	2			3	1	2	2	2	1	2
31	2	12	44	1	2	2	2	2	2			1	2	2	2	2	2	2
32	2	36	38	1	2	2	2	2	2			3	2	2	2	2	2	2
33	2	23	6	1	2	2	2	2	2			3	2	1	1	2	1	1
34	2	20	18	1	2	2	2	2	2			2	2	2	2	2	2	2
35	1	52	36	1	1	1	2	2	2			3	1	2	1	2	2	2
36	2	15	44	1	2	2	2	2	2			3	2	2	1	1	2	1
37	1	21	12	1	2	2	2	2	2			3	1	1	2	2	1	2
38	1	26	24	1	2	2	2	2	2			1	2	2	1	2	2	2
39	1	24	60	1	2	2	2	2	2			3	1	1	1	1	1	2
40	1	19	38	1	2	2	2	2	2			2	2	2	1	1	2	1
41	2	19	4	1	2	2	2	2	2			2	1	2	2	1	2	2
42	2	19	60	1	2	2	2	2	2			3	1	2	1	2	2	2
43	1	14	28	1	2	2	2	2	2			1	1	1	2	2	2	2
44	1	31	2	1	2	2	2	2	2			1	3	2	2	2	2	2
45	2	40	24	1	1	2	2	2	2			3	1	2	2	2	1	2
46	1	17	22	1	2	2	2	2	2			3	3	1	1	1	1	1
47	2	23	12	1	2	2	2	2	2			1	2	2	1	2	2	2
48	1	34	28	1	1	2	2	2	2			3	2	2	2	2	2	2
49	2	49	48	1	2	2	1	2	1			3	2	2	1	1	2	2
50	1	33	100	1	1	1	2	2	2			1	1	2	1	1	2	2
51	2	18	180	1	2	2	2	2	2			1	1	1	2	2	2	2
52	1	31	38	1	1	2	2	2	2			1	2	2	2	1	2	2
53	1	19	120	1	2	2	2	2	2			1	3	2	1	1	2	1
54	1	53	24	1	1	1	2	2	2			1	2	1	2	1	2	2
55	2	51	12	1	2	2	2	1	2	13	38	3	2	2	1	2	2	1
56	1	19	44	1	2	2	2	2	2			1	2	1	1	2	2	2
57	2	30	72	1	2	2	2	2	2			1	1	2	2	2	2	2
58	1	21	24	1	2	2	2	2	2			1	2	2	2	2	2	2
59	1	44	2	1	1	1	2	2	1			2	1	1	2	2	2	2
60	1	22	12	1	2	1	2	2	2			3	2	1	2	1	2	1
61	1	46	24	1	2	1	2	2	2			1	1	2	2	2	2	2
62	2	61	108	1	1	2	2	2	2			1	1	2	2	2	2	2
63	1	33	6	1	2	1	2	2	2			3	3	2	2	2	2	2
64	1	22	72	1	2	2	2	2	2			1	2	2	1	2	2	2
65	1	21	24	1	1	2	2	2	2			3	1	2	1	1	2	2
66	2	29	96	1	1	2	2	2	2			3	1	2	2	2	1	2
67	1	36	11	1	2	2	2	2	2			1	2	2	1	1	1	1
68	1	43	84	1	2	2	2	1	2	1	42	1	2	2	2	2	1	2
69	1	51	24	1	1	2	2	2	2			1	2	2	1	1	2	2
70	2	51	12	1	1	2	2	2	2			3	2	2	1	1	2	1
71	1	15	36	1	2	2	2	2	2			3	2	2	2	2	1	2
72	2	44	60	1	1	2	2	2	2			2	1	2	2	2	2	2
73	1	27	2	1	1	2	2	2	2			1	2	2	1	2	2	2
74	2	35	72	1	2	2	2	2	2			1	1	2	2	2	2	2
75	1	44	45	1	2	2	2	2	2			3	2	2	1	2	2	2
76	2	56	48	1	2	1	1	2	2			3	1	2	1	2	2	2
77	1	11	12	1	2	2	2	2	2			1	2	2	2	1	2	2
78	1	42	44	1	2	2	2	2	2			3	2	2	1	2	2	1
79	2	17	48	1	2	2	2	2	2			2	1	1	1	2	2	2
80	2	12	6	1	2	2	2	2	2			3	1	2	2	2	2	2
81	1	39	60	1	1	2	2	1	2	36	3	1	2	2	2	2	2	1
82	2	46	60	1	1	2	2	2	2			3	2	2	2	1	2	2
83	2	39	44	1	1	2	2	2	2			3	2	2	2	2	1	2
84	2	44	18	1	2	2	2	2	2			3	2	2	2	2	2	2
85	2	52	48	1	1	2	2	2	2			1	2	2	1	2	2	2
86	2	18	12	1	2	2	2	2	2			3	2	2	2	2	1	2
87	1	35	44	1	2	2	2	2	2			3	2	2	1	1	2	2
88	1	35	11	1	2	2	2	2	2			2	3	2	2	2	2	2
89	1	50	12	1	1	1	2	2	2			3	2	2	1	1	2	2
90	1	53	24	1	2	1	2	2	2			1	2	2	2	1	2	2
91	2	51	24	1	1	2	2	2	2			3	1	2	2	2	2	2
92	2	37	36	1	1	1	2	2	2			3	3	2	2	2	2	2
93	1	17	12	1	2	1	2	2	2			3	1	1	2	2	1	2
94	1	27	72	1	2	2	2	2	2			3	2	2	2	2	1	2
95	1	12	72	1	2	2	2	2	2			1	1	2	2	2	2	2
96	2	15	100	1	2	2	2	2	2			2	2	2	2	2	1	2
97	1	25	48	1	2	2	2	2	2			2	1	2	1	1	2	2
98	2	29	24	1	1	2	2	2	2			3	1	2	1	2	2	2
99	1	32	44	1	2	1	2	1	2	15	17	1	3	2	2	2	2	1
100	1	24	36	1	2	2	2	2	2			1	1	2	2	2	2	2
101	2	16	48	1	2	2	2	2	2			3	1	2	1	1	2	2
102	1	13	72	1	2	2	2	2	2			1	3	2	1	2	1	1
103	2	53	36	1	2	2	2	1	2	27	26	3	2	1	1	1	2	2
104	2	26	36	1	2	2	2	2	2			3	1	2	1	2	2	2
105	1	8	200	1	2	2	2	2	2			1	1	2	1	1	2	2
106	2	49	24	1	2	2	2	2	2			1	3	2	2	2	2	1
107	1	13	48	1	2	2	2	2	2			3	1	1	2	2	1	2
108	1	38	56	1	1	2	2	2	2			3	2	1	1	1	1	2
109	1	42	44	1	1	1	2	2	2			1	3	2	2	1	1	2
110	2	59	48	1	1	1	1	2	2			1	2	2	2	2	2	2
111	1	24	48	1	1	1	2	2	2			2	1	1	2	1	1	2
112	2	26	44	1	2	1	2	2	2			3	3	2	2	2	1	1
113	1	56	22	1	1	2	2	2	2			1	3	2	2	2	2	1
114	1	23	48	1	2	2	2	2	2			2	2	2	1	1	2	2
115	1	24	12	1	2	2	2	2	2			1	3	2	1	1	2	2
116	2	60	34	1	2	2	1	2	2			1	2	2	2	1	2	2
117	1	47	44	1	1	1	2	2	2			3	2	2	1	2	1	2
118	2	20	48	1	2	2	2	2	2			2	1	2	2	1	2	2
119	2	16	1	1	2	2	2	2	2			2	1	2	1	2	2	2
120	1	28	12	1	2	2	2	2	2			1	3	2	2	2	2	1
121	1	44	12	1	2	2	2	2	2			1	2	2	2	1	2	2
122	1	54	1	1	2	2	2	2	2			1	3	2	2	2	2	2
123	1	50	36	2	1	1	2	2	2			1	1	2	2	2	2	2
124	1	37	34	1	1	2	2	2	2			1	3	2	1	1	2	1
125	2	15	16	2	2	2	2	2	2			3	2	2	2	2	1	2
126	2	25	24	1	2	1	2	2	2			3	3	2	1	2	2	2
127	1	26	200	1	2	1	1	2	2			1	2	2	1	2	1	2
128	1	23	12	1	2	2	2	2	2			3	3	2	1	1	2	1
129	2	38	12	1	2	2	2	2	2			3	1	1	2	1	2	2
130	2	41	48	1	2	1	2	2	2			3	2	2	2	2	2	1
131	2	27	72	1	2	2	2	2	2			3	2	2	2	1	1	1
132	2	26	36	1	1	2	2	2	2			2	2	2	1	1	2	2
133	2	18	24	1	2	2	2	2	2			3	2	2	2	2	2	2
134	2	29	44	1	1	1	2	2	2			3	3	1	1	2	2	1
135	1	24	18	1	2	2	2	2	2			1	3	1	2	2	1	2
136	2	17	36	1	1	2	2	2	2			3	2	1	2	1	1	2
137	2	14	48	1	2	2	2	2	2			3	1	2	1	1	1	2
138	1	34	36	1	1	2	2	2	2			1	3	2	1	2	1	1
139	1	16	36	1	1	2	2	2	2			3	1	1	1	1	2	2
140	2	26	36	1	2	2	2	1	2	3	23	1	1	1	1	1	2	2
141	2	42	120	1	1	2	2	2	2			2	1	1	2	2	2	2
142	1	72	200	1	2	2	2	2	2			1	1	2	1	1	2	2
143	1	16	24	1	2	2	2	2	2			2	1	2	2	2	2	1
144	2	26	12	1	2	2	2	1	2	6	20	3	3	2	1	2	1	2
145	1	12	48	1	2	2	2	2	2			1	1	2	1	2	1	2
146	1	21	96	1	2	2	2	1	2	8	12	3	2	2	1	2	1	2
147	1	29	48	1	2	2	2	2	2			1	1	2	1	1	2	2
148	2	16	36	1	2	2	2	2	2			3	2	1	1	1	2	1
149	2	43	44	1	1	2	2	2	2			1	1	2	1	2	2	2
150	1	17	44	1	1	1	2	2	2			3	1	1	1	1	1	2
151	2	60	24	1	2	2	2	2	2			1	2	2	2	2	2	1
152	1	19	12	1	2	2	2	2	2			2	2	2	1	1	2	2
153	2	52	72	1	2	2	1	2	2			3	1	2	2	2	2	2
154	2	20	24	1	2	2	2	2	2			3	1	1	1	2	2	2
155	1	38	60	1	2	2	2	2	2			1	1	2	2	1	2	1
156	1	23	34	1	1	2	2	2	2			3	2	1	2	1	2	2
157	1	51	12	1	2	1	2	2	2			1	2	2	1	1	2	1
158	2	50	34	1	1	2	2	2	2			1	1	2	2	1	2	2
159	1	18	44	1	2	2	2	2	2			3	2	2	1	2	2	2
160	1	31	120	2	1	2	2	2	2			3	2	2	2	2	2	2
161	1	30	36	1	2	2	2	2	2			1	1	2	2	1	2	2
162	1	22	24	1	2	1	2	2	2			3	2	2	1	2	2	2
163	2	33	60	1	2	1	2	2	2			1	2	2	2	2	2	1
164	1	21	24	1	2	2	2	2	2			3	3	2	1	1	2	2
165	1	44	48	1	1	2	2	2	2			3	2	2	2	2	2	2
166	1	24	44	1	2	2	2	2	2			2	1	2	2	2	1	2
167	2	59	48	1	2	2	2	2	2			2	1	2	2	2	2	2
168	1	21	108	1	2	2	2	2	2			1	1	2	1	2	2	2
169	2	27	60	1	1	2	2	2	2			3	2	2	2	2	2	1
170	2	34	24	1	2	2	2	2	2			2	2	2	1	2	2	2
171	1	42	44	1	1	1	2	2	2			1	1	2	2	2	2	1
172	2	41	120	1	1	2	2	1	2	1	40	1	2	2	1	1	1	2
173	2	38	6	1	1	2	2	2	2			2	1	2	2	2	2	2
174	1	38	18	1	1	1	2	2	2			1	1	2	2	2	2	2
175	1	39	5	1	1	2	2	2	2			3	3	1	2	2	2	2
176	1	10	34	1	2	2	2	2	2			3	2	1	2	1	2	1
177	1	33	24	1	1	1	2	1	1	9	24	1	1	3	2	2	1	1
178	1	17	34	1	2	2	2	2	2			1	1	1	2	1	2	2
179	1	17	36	2	2	2	2	2	2			3	1	2				2
180	2	34	45	1	2	2	2	2	2			3	1	2	2	2	2	2
181	2	50	38	2	2	2	2	1	2	9	41	2	2	1	2	2	2	1
182	1	45	12	1	1	1	2	2	2			1	1	2	1	1	2	2
183	1	18	36	1	2	1	2	2	2			1	1	2	2	1	2	2
184	1	29	48	1	1	2	2	2	2			3	2	2	1	2	2	2
185	1	23	156	1	2	2	2	2	2			1	2	2	2	2	2	2
186	1	42	128	1	1	1	2	2	2			3	1	2	1	2	2	2
187	2	39	48	1	2	2	2	2	2			3	2	2	2	2	2	2
188	2	57	30	1	1	2	2	2	1			3	2	2	2	2	2	2
189	2	44	54	1	2	2	2	2	2			1	3	2	2	2	2	1
190	2	29	36	1	2	2	2	2	2			3	1	1	1	1	2	2
191	2	33	24	1	1	2	2	2	2			1	2	1	2	2	2	2
192	1	27	45	1	2	2	2	2	2			1	2	2	1	1	1	2
193	1	26	60	1	1	2	2	2	2			3	1	2	2	2	2	2
194	1	57	125	1	1	2	2	1	2	11	46	2	2	2	2	2	2	2
195	1	24	48	1	1	2	2	2	2			3	2	1	2	1	1	2
196	1	19	8	1	2	2	2	2	2			1	1	2	2	2	1	2
197	2	45	72	1	1	1	2	2	2			3	2	2	1	1	2	2
198	1	16	12	1	2	2	2	2	2			3	2	2	2	2	1	2
199	1	33	34	1	1	1	2	2	2			1	1	2	2	1	2	2
200	2	54	30	1	2	2	2	2	2			3	1	2	2	2	2	2
201	1	48	96	1	2	2	2	1	2	28	20	1	1	2	2	2	1	2
202	1	49	36	1	1	1	2	2	2			1	2	2	2	2	2	2
203	1	22	44	1	1	2	2	2	2			3	3	1	1	2	1	2
204	2	58	12	1	2	2	1	2	2			1	1	2	2	2	2	2
205	1	21	12	1	2	2	2	2	2			1	1	2	1	2	2	2
206	2	41	36	1	2	2	2	2	2			3	2	2	1	2	2	2
207	1	19	34	1	2	2	2	2	2			3	3	2	1	1	2	2
208	1	17	24	1	1	2	2	2	2			1	2	2	1	2	2	2
209	1	27	18	1	1	2	2	2	2			1	2	2	2	1	2	1
210	1	24	24	1	2	2	2	2	2			1	3	2	1	1	2	2
211	2	35	38	2	1	2	2	2	2			3	1	1	1	1	2	2
212	1	26	12	1	1	2	2	2	2			3	2	2	2	2	2	2
213	1	35	24	1	1	1	2	2	2			1	1	2	2	2	1	2
214	1	32	48	1	2	2	2	2	2			1	2	2	2	2	2	2
215	2	19	12	2	1	2	2	2	2			1	1	2	2	2	2	2
216	2	33	44	1	1	2	2	2	2			3	2	2	1	1	2	1
217	1	64	24	1	2	1	2	2	2			1	1	2	2	2	2	2
218	1	31	24	1	2	2	2	2	2			1	3	2	1	2	2	1
219	1	31	156	1	2	2	1	2	2			3	1	2	2	2	2	1
220	2	38	48	1	2	2	2	2	2			3	2	2	2	2	2	2
221	1	43	60	1	1	2	2	1	2	25	18	1	1	1	1	1	2	2
222	1	19	24	1	2	2	2	2	2			3	2	1	1	1	2	2
223	2	48	12	1	2	2	2	2	2			1	2	2	2	2	2	2
224	2	38	12	1	2	2	2	2	2			1	1	2	2	1	2	2
225	2	22	34	1	2	2	2	2	2			3	1	1	1	1	1	2
226	2	44	36	1	1	2	2	2	2			1	1	2	2	2	2	2
227	2	32	12	1	2	2	2	2	2			3	1	1	2	2	2	2
228	2	33	60	1	2	2	2	2	2			1	2	2	1	1	2	2
229	1	42	108	1	1	2	2	2	1			1	3	2	2	2	2	1
230	1	23	100	1	2	2	2	2	2			3	2	1	2	2	1	2
231	1	15	100	1	2	2	2	1	2	1	14	3	3	2	1	1	2	2
232	1	32	36	1	2	2	2	2	2			1	2	2	2	2	2	2
233	1	35	36	1	2	2	2	1	2	7	28	3	2	2	2	2	2	2
234	1	36	33	1	2	1	2	2	2			2	1	2	2	2	2	2
235	1	13	28	1	1	2	2	2	2			3	2	1	1	1	1	2
236	1	42	24	1	2	2	2	2	2			3	2	2	1	1	1	2
237	1	25	48	1	1	2	2	2	2			3	1	1	2	2	1	2
238	1	50	24	1	2	1	2	2	2			1	2	2	2	2	2	2
239	2	40	84	1	1	2	2	2	2			3	1	2	2	2	2	2
240	1	54	2	1	1	2	2	2	2			3	2	2	2	2	2	2
241	1	24	44	1	2	2	2	2	2			3	1	2	1	2	2	2
242	1	53	38	1	2	1	2	2	2			1	3	2	2	2	2	2
243	1	27	12	1	1	2	2	2	2			3	2	2	1	2	2	1
244	1	34	84	1	2	2	2	2	2			1	1	2	2	2	2	2
245	2	29	12	1	2	1	2	2	2			3	2	2	2	2	2	2
246	1	50	48	1	1	2	2	2	2			2	2	2	1	1	2	2
247	2	20	48	1	2	2	2	2	2			1	3	2	1	1	2	1
248	2	49	34	1	2	2	2	2	2			2	1	2	2	2	2	2
249	1	22	44	1	2	1	2	2	2			1	1	2	2	2	1	2
250	2	23	36	1	2	2	2	2	2			1	2	1	2	2	2	2
251	2	38	100	1	2	2	2	2	2			2	3	2	1	1	2	1
252	2	41	12	1	2	2	2	2	2			3	1	2	2	2	2	2
253	1	28	36	1	1	2	2	2	2			3	3	2	1	2	2	1
254	1	14	84	1	2	2	2	2	2			3	2	1	1	2	2	2
255	1	29	120	1	1	2	2	2	2			1	2	2	1	2	2	1
256	1	25	45	1	2	2	2	2	2			1	2	2	2	2	1	2
257	1	17	12	1	2	2	2	2	2			3	2	2	2	2	2	2
258	1	36	72	1	2	2	2	2	2			1	3	2	2	2	2	1
259	1	14	120	1	2	2	2	2	2			3	1	2	2	2	2	2
260	1	51	5	1	1	2	2	2	2			1	2	2	1	1	2	2
261	1	22	260	1	2	2	2	2	2			1	2	2	1	2	2	2
262	2	14	108	1	2	2	2	2	2			2	3	2	1	1	2	1
263	2	35	9	1	2	2	2	2	2			1	1	2	2	2	2	2
264	1	25	44	2	2	2	2	1	2	11	14	3	1	2	1	1	2	2
265	2	57	48	1	2	2	2	2	2			1	3	2	1	1	2	2
266	2	17	44	1	2	2	2	2	2			2	2	2	1	2	2	2
267	1	28	7	1	2	2	2	2	2			3	1	2	1	1	2	2
268	2	42	156	2	1	2	2	2	2			1	3	2	2	2	2	1
269	2	35	24	1	2	2	2	2	2			2	3	1	1	2	1	1
270	1	22	34	1	1	2	2	2	2			3	1	2	1	1	1	2
271	1	21	48	1	2	2	2	2	2			3	2	2	1	1	1	2
272	1	23	34	1	1	1	2	2	2			3	2	2	2	1	1	2
273	1	29	45	1	2	2	2	2	2			3	1	2	1	1	2	2
274	1	18	43	1	2	2	2	2	2			1	2	2	1	2	2	2
275	1	21	4	1	2	2	2	2	2			1	2	2	2	2	2	2
276	2	30	48	1	2	2	2	2	2			3	1	2	2	2	2	2
277	1	26	72	1	2	2	2	1	2	18	8	1	1	2	1	2	2	2
278	1	30	34	1	1	2	2	2	2			3	2	2	2	2	2	2
279	1	14	36	1	2	2	2	2	2			1	3	2	2	1	2	1
280	1	14	12	1	2	2	2	2	2			2	1	1	1	2	2	2
281	1	32	44	1	2	2	2	2	2			1	2	1	2	2	1	2
282	1	28	120	1	2	1	2	2	2			1	2	2	2	2	2	1
283	2	46	24	1	1	2	2	1	2	9	37	3	2	2	1	2	1	2
284	1	24	2	1	2	2	2	2	2			3	2	2	2	2	2	2
285	2	34	36	1	2	2	2	2	2			1	1	2	2	1	2	2
286	1	26	36	1	1	2	2	1	2	6	20	1	1	2	1	2	2	2
287	1	31	88	1	2	2	2	1	2	3	28	3	2	2	2	2	2	2
288	2	41	44	1	1	2	2	2	2			1	1	2	1	1	1	2
289	2	24	44	1	1	2	2	2	2			1	3	1	2	1	2	1
290	2	21	12	1	2	2	2	2	2			3	1	2	2	1	2	2
291	1	51	5	1	1	1	2	2	2			1	1	2	2	2	2	2
292	1	25	24	1	2	2	2	2	2			1	2	1	1	1	2	1
293	1	37	24	1	2	2	2	2	2			1	2	2	1	2	2	1
294	2	15	60	1	2	2	2	2	2			1	1	2	2	2	2	2
295	2	35	36	1	2	2	2	1	2	1	16	3	1	2	2	2	2	2
296	2	24	72	1	2	2	2	2	2			3	1	2	2	2	1	2
297	2	49	43	1	2	2	2	2	2			1	1	2	1	2	1	2
298	1	14	48	1	1	2	2	2	2			3	1	2	2	2	1	2
299	2	28	34	1	2	2	2	2	2			1	1	1	1	2	2	2
300	1	31	84	1	2	2	2	2	2			3	3	2	2	1	2	1
301	2	16	12	1	2	2	2	2	2			3	1	2	1	2	1	2
302	1	33	120	1	1	2	2	2	2			1	2	2	2	2	2	1
303	2	29	43	1	1	2	2	2	2			1	2	2	2	1	2	2
304	2	42	38	1	1	2	2	2	2			3	1	2	2	2	2	2
305	1	38	12	1	1	2	2	2	2			1	2	2	2	1	2	2
306	1	25	42	1	2	2	2	2	2			3	2	2	1	1	2	2
307	1	15	60	1	1	2	2	2	2			1	1	2	1	2	2	2
308	1	50	48	1	2	2	2	2	2			1	3	2	1	2	2	1
309	2	50	12	1	1	2	2	2	2			2	1	2	2	2	2	2
310	1	48	48	1	1	2	1	2	2			1	2	2	2	2	2	2
311	1	20	36	1	2	2	2	2	2			1	1	2	2	2	1	2
312	2	55	48	1	1	2	1	2	2			2	1	2	1	1	1	2
313	1	26	12	1	1	1	2	2	2			3	1	1	1	1	2	1
314	1	43	244	1	1	1	2	2	2			2	1	2	2	2	2	2
315	1	27	36	1	1	1	2	2	2			3	1	1	2	2	1	2
316	1	23	12	1	2	2	2	2	2			1	1	2	2	2	2	2
317	1	76	3	1	2	2	2	2	2			1	2	2	2	2	2	1
318	1	40	120	1	2	1	2	2	2			1	1	2	1	1	2	2
319	1	47	36	1	1	1	2	2	1			3	2	2	2	2	2	1
320	1	58	48	1	1	2	2	2	2			1	2	2	2	2	2	2
321	1	31	156	1	2	2	2	2	2			3	1	1	1	2	1	2
322	2	24	24	2	2	2	2	2	2			3	3	2	2	2	2	2
323	1	62	84	1	2	2	1	2	2			1	2	1	2	1	2	1
324	2	42	34	1	2	2	2	1	2	23	19	2	2	2	2	2	2	2
325	2	31	120	1	1	2	2	2	2			3	3	2	2	2	2	1
326	1	22	72	1	2	2	2	2	2			3	2	2	1	1	2	2
327	1	18	60	1	2	2	2	2	2			3	2	2	1	2	2	2
328	1	42	12	1	2	2	2	2	2			3	1	2	2	2	2	2
329	2	19	56	1	2	2	2	2	2			1	2	1	1	2	2	2
330	1	24	18	1	1	2	2	2	2			3	1	2	2	2	1	2
331	2	21	36	1	2	2	2	2	2			1	2	2	2	2	1	2
332	1	24	48	1	2	2	2	2	2			3	2	2	1	2	2	1
333	1	29	48	1	1	2	2	2	2			3	3	2	2	2	2	2
334	2	44	43	1	2	2	2	2	2			1	3	2	2	2	2	2
335	2	7	156	1	2	2	2	2	2			1	1	2	1	2	2	1
336	2	59	280	1	2	2	2	2	2			2	1	2	2	2	2	2
337	1	19	45	1	2	2	2	2	2			3	2	2	1	1	1	2
338	1	22	4	1	2	2	2	2	2			3	2	2	1	2	2	2
339	1	26	60	1	2	2	2	2	2			3	1	2	1	2	2	2
340	1	32	96	1	2	2	2	2	2			3	2	2	1	1	2	2
341	1	45	48	1	1	2	2	2	2			3	2	2	1	1	2	2
342	1	64	48	1	2	2	2	2	2			1	1	2	2	2	2	2
343	1	33	54	1	2	2	2	2	2			2	2	2	1	1	2	1
344	1	58	36	1	2	2	2	2	2			1	2	2	2	2	2	2
345	1	57	5	1	1	1	2	2	2			2	2	2	1	2	1	2
346	1	62	24	1	2	2	2	2	2			2	1	2	2	2	2	1
347	1	17	192	1	2	2	2	2	2			3	1	1	1	1	1	2
348	1	16	48	1	2	2	2	2	2			1	1	1	2	2	2	2
349	1	74	24	1	1	2	1	2	2			3	1	2	1	1	2	2
350	2	48	22	1	2	2	2	1	2	2	46	1	2	3	1	1	2	1
351	1	50	48	1	1	2	2	2	2			2	3	2	2	2	2	1
352	2	23	96	1	1	2	2	2	2			3	1	1	1	2	2	2
353	2	30	180	1	2	2	1	1	2	7	23	1	2	2	2	2	2	2
354	1	27	180	1	1	2	1	1	2	8	19	3	2	2	2	2	2	2
355	1	22	34	1	2	1	2	2	2			1	1	2	1	1	2	2
356	1	21	240	1	2	2	2	2	2			1	1	1	1	1	1	2
357	1	27	34	1	1	2	2	1	2	3	24	1	2	1	2	2	2	2
358	1	33	36	1	2	1	2	2	2			1	1	2	2	2	2	2
359	1	17	48	1	2	1	2	1	2	11	6	1	2	2	2	2	2	2
360	1	19	60	1	1	2	2	2	2			3	2	1	2	2	2	2
361	1	66	84	1	2	2	2	2	2			2	2	2	2	2	2	1
362	1	47	48	1	2	1	2	2	2			1	1	2	1	1	2	2
363	1	43	34	1	1	1	2	2	2			1	1	2	2	2	2	2
364	1	24	3	1	1	2	2	2	2			1	3	2	2	2	2	1
365	2	19	72	1	2	2	2	2	2			3	3	2	1	1	2	1
366	2	20	10	1	2	2	2	2	2			2	3	2	2	2	2	1
367	1	23	5	1	2	1	2	2	2			2	1	1	2	2	1	2
368	1	22	36	1	2	2	2	2	2			2	2	2	1	1	2	2
369	2	40	48	1	1	2	2	2	2			3	1	2	1	2	2	2
370	1	38	48	1	1	2	2	2	2			3	1	2	2	2	1	2
371	1	31	12	1	2	2	2	2	2			3	1	2	1	1	2	2
372	1	19	96	1	2	1	2	2	2			1	2	2	2	2	2	2
373	1	25	36	1	2	2	2	2	2			1	3	2	1	1	2	2
374	1	17	2	1	2	2	2	2	2			3	2	1	1	1	2	2
375	1	59	48	1	1	2	2	2	2			3	2	1	2	2	2	2
376	2	54	44	1	2	2	2	2	2			3	2	2	1	1	2	1
377	1	21	84	1	2	2	2	2	2			3	2	1	1	2	2	2
378	1	22	8	1	1	1	2	2	2			1	2	1	2	2	2	2
379	1	11	48	1	2	1	2	2	2			1	1	2	2	2	2	2
380	2	18	60	1	2	2	2	2	2			3	1	1	1	2	2	2
381	1	60	44	1	2	2	2	2	2			3	1	2	1	2	2	2
382	2	51	60	1	1	2	2	2	2			3	1	2	1	1	2	2
383	2	18	72	1	2	2	2	2	2			2	1	2	2	2	2	2
384	2	21	120	1	2	2	2	2	2			3	2	2	2	2	1	2
385	2	16	60	1	1	2	2	2	2			1	2	1	1	1	2	2
386	2	23	44	1	2	2	2	2	2			3	1	2	1	1	2	2
387	2	24	180	1	1	2	2	2	2			3	1	2	2	2	1	2
388	1	32	48	1	1	2	2	2	2			2	3	2	1	2	2	1
389	2	60	12	1	1	2	2	2	2			1	2	2	2	2	2	1
390	1	21	84	1	2	2	2	2	2			3	1	1	2	2	1	2
391	2	53	60	1	2	2	2	2	2			1	1	2	2	1	2	2
392	1	28	24	1	2	2	2	2	2			3	1	2	2	1	2	2
393	1	26	44	1	1	2	2	2	2			3	1	2	1	1	2	2
394	2	29	24	1	1	2	2	2	2			3	1	2	2	2	2	2
395	1	48	12	1	2	1	2	1	2	2	46	3	2	3	2	2	2	1
396	1	19	48	1	1	2	2	2	2			3	2	2	2	1	1	1
397	2	33	156	1	1	2	2	2	2			1	1	2	1	1	2	2
398	1	21	60	1	2	2	2	2	2			3	1	1	1	1	2	2
399	2	76	6	1	2	2	1	2	2			2	3	2	1	2	2	2
400	1	21	36	1	2	2	2	2	2			1	1	2	2	2	2	2
401	1	23	4	1	1	2	2	2	2			3	2	2	1	1	2	1
402	1	16	96	1	2	2	2	2	2			1	2	2	2	2	2	2
403	1	20	12	1	2	2	2	1	2	3	17	1	3	1	2	2	2	2
404	1	49	12	1	1	2	2	2	2			1	3	2	1	1	1	2
405	1	22	48	1	1	1	2	2	2			2	1	1	1	1	2	1
406	2	15	36	1	1	2	2	2	2			1	1	2	1	2	1	2
407	1	21	43	1	2	2	2	2	2			3	3	2	2	2	2	2
408	1	23	96	1	1	2	2	2	2			3	2	1	2	1	2	2
409	1	17	18	1	2	2	2	2	2			1	2	1	2	2	1	2
410	1	27	24	1	2	2	2	2	2			3	2	2	1	1	2	1
411	1	28	30	1	2	2	2	2	2			3	3	2	1	2	2	1
412	1	45	48	1	1	2	2	1	2	11	34	1	2	2	1	1	2	2
413	1	33	48	1	1	1	2	2	2			3	2	1	2	1	2	2
414	1	33	34	1	1	2	2	2	2			2	1	2	1	2	2	2
415	1	47	24	1	1	1	2	2	2			2	2	2	1	1	2	2
416	1	22	36	1	2	2	2	2	2			3	3	2	2	2	2	1
417	1	29	3	1	1	2	2	2	2			3	2	1	2	2	2	2
418	1	20	24	1	2	2	2	2	2			3	2	1	1	1	2	2
419	1	29	43	1	2	2	2	2	2			1	1	2	2	2	2	2
420	1	61	24	1	1	2	2	2	2			1	1	2	2	2	2	2
421	2	27	24	1	2	2	2	2	2			1	2	2	1	2	2	2
422	1	28	12	1	2	2	2	2	2			1	2	1	1	2	1	2
423	1	69	44	1	2	2	2	2	2			1	2	2	2	2	2	2
424	1	31	24	1	1	2	2	2	2			3	1	2	1	1	2	2
425	2	37	12	1	2	2	2	2	2			3	1	2	2	2	2	2
426	1	17	12	1	2	1	2	2	2			1	1	2	1	1	2	1
427	1	27	2	1	1	2	2	2	2			2	2	2	1	1	2	2
428	1	26	36	1	2	2	2	2	2			1	1	2	2	2	2	2
429	1	30	60	1	2	2	2	2	2			1	3	1	1	1	2	1
430	2	31	72	2	2	2	2	2	2			1	2	2	2	2	2	2
431	1	60	72	1	2	2	2	2	2			2	2	2	2	2	2	2
432	1	20	6	1	2	2	2	2	2			3	1	1	1	2	2	2
433	1	21	12	1	2	1	2	2	2			1	1	2	1	1	2	2
434	1	19	36	1	2	1	2	2	2			3	1	2	2	2	2	2
435	1	35	24	1	1	2	2	2	2			3	1	2	1	2	2	2
436	1	31	24	1	2	2	2	2	2			1	3	2	2	1	2	1
437	2	27	24	1	2	2	2	2	1			2	2	2	1	2	2	2
438	1	60	44	1	1	1	2	2	2			2	2	2	2	2	2	2
439	1	37	96	1	1	2	2	2	2			1	2	2	1	1	2	2
440	2	40	34	1	2	1	2	2	2			1	3	2	1	1	2	1
441	1	55	12	1	2	2	2	2	2			3	3	2	2	2	2	1
442	1	17	156	1	2	1	2	2	1			3	2	2	1	1	2	2
443	1	31	6	1	1	1	2	2	2			2	1	2	2	2	2	2
444	2	14	24	1	1	2	2	2	2			3	2	2	1	1	2	2
445	2	25	12	1	2	2	2	2	2			3	1	1	1	1	2	2
446	1	41	24	1	1	2	2	2	1			1	2	2	1	2	2	2
447	1	28	44	1	2	2	2	1	2	1	26	3	2	2	1	1	2	2
448	2	25	24	1	2	2	2	1	2	10	15	3	1	2	2	2	2	2
449	1	27	12	1	2	2	2	1	2	1	26	1	1	2	2	2	1	2
450	1	50	8	1	1	1	2	2	2			2	1	2	2	2	2	2
451	1	21	42	1	2	2	2	2	2			3	3	2	2	1	2	1
452	1	14	120	1	2	2	2	2	2			1	2	2	1	1	2	2
453	2	34	12	1	1	2	2	2	2			3	2	2	2	2	1	2
454	1	34	24	1	1	2	2	2	2			3	3	2	1	2	2	2
455	1	30	84	1	1	2	2	2	2			3	3	2	2	2	2	2
456	1	25	12	1	2	2	2	2	2			3	1	1	2	1	2	2
457	1	71	36	1	1	1	1	2	2			2	1	2	2	2	2	2
458	1	50	43	1	1	1	2	2	2			3	2	2	1	2	2	1
459	2	17	12	1	1	2	2	2	1			3	1	2	2	2	2	2
460	1	54	36	1	2	1	2	2	2			1	2	2	1	1	2	2
461	2	43	2	1	2	2	2	2	2			1	3	2	2	2	2	1
462	1	41	96	1	1	2	2	2	2			1	1	2	2	2	2	2
463	1	24	36	1	2	1	2	2	2			1	3	2	2	1	1	2
464	2	38	34	1	1	2	2	2	2			1	1	2	2	2	2	2
465	2	24	48	1	2	2	2	2	2			1	2	2	1	2	2	2
466	1	27	60	1	2	2	2	2	2			1	2	2	2	2	2	2
467	2	19	44	1	2	2	2	2	2			2	2	2	1	1	2	2
468	1	45	44	1	1	2	2	2	2			1	2	2	1	1	2	1
469	2	27	36	1	2	2	2	2	2			1	3	2	2	2	1	1
470	1	25	24	1	2	2	2	2	2			3	3	2	2	1	2	2
471	1	17	48	1	2	2	2	2	2			3	1	2	1	1	2	2
472	1	27	48	1	2	2	2	2	2			2	2	2	1	2	2	2
473	1	28	72	1	2	2	2	2	2			3	3	2	2	2	1	2
474	1	23	5	1	2	2	2	2	2			1	1	2	2	2	2	2
475	1	20	36	1	2	2	2	2	2			2	2	2	1	1	2	2
476	2	45	3	1	1	1	2	2	2			1	1	2	2	1	2	2
477	1	39	108	1	1	1	2	2	2			3	3	2	1	1	2	1
478	2	53	96	1	2	2	2	2	2			1	1	2	2	2	2	2
479	2	55	36	1	2	2	2	2	2			2	2	2	2	2	2	2
480	2	57	12	1	2	1	1	2	2			3	2	2	2	2	2	2
481	1	23	96	1	2	2	2	2	2			2	1	2	1	1	2	2
482	2	39	60	1	1	2	2	2	2			3	2	2	2	2	2	2
483	2	36	18	1	1	2	2	2	2			2	2	2	1	1	2	2
484	1	31	108	1	1	2	1	2	2			3	1	2	1	1	2	1
485	1	39	48	1	1	1	2	2	2			3	2	2	2	2	2	1
486	1	18	12	1	2	2	2	2	2			1	1	1	2	2	1	2
487	2	14	24	1	1	2	2	2	2			1	3	2	1	2	2	1
488	1	33	18	1	1	2	2	2	1			3	3	2	2	1	2	2
489	2	12	120	1	2	2	2	2	2			1	2	2	1	1	2	2
490	2	25	44	1	2	2	2	2	2			3	1	2	1	2	1	2
491	2	27	36	1	1	2	2	2	2			3	2	2	1	1	2	2
492	1	36	36	1	2	2	2	2	2			1	2	1	2	2	2	1
493	2	19	10	1	2	2	2	1	2	9	10	2	3	2	2	2	2	2
494	1	62	12	1	1	1	2	2	2			1	1	2	2	2	2	2
495	1	20	72	1	1	2	2	2	2			1	3	2	2	2	2	2
496	1	16	10	1	2	2	2	2	2			1	1	1	1	2	2	2
497	1	25	96	1	2	2	2	2	2			1	1	2	1	1	2	2
498	1	29	12	1	2	2	2	2	2			3	2	2	1	1	1	1
499	1	27	240	1	2	2	2	2	2			1	3	2	2	2	2	1
500	1	19	24	1	2	2	2	2	2			3	2	1	1	2	2	2
501	2	56	4	2	2	2	2	2	2			3	2	1	2	2	2	2
502	1	29	44	1	2	2	2	2	2			1	2	1	2	2	1	2
503	1	30	48	1	2	2	2	2	2			1	2	2	2	1	2	2
504	2	24	24	1	1	2	2	1	2	3	21	3	2	3	1	1	2	1
505	1	30	36	1	2	1	2	2	2			3	3	2	2	1	2	1
506	1	21	18	1	2	2	2	2	2			3	1	2	1	1	2	2
507	1	20	12	1	2	2	2	2	2			1	3	1	1	1	1	2
508	1	24	60	1	2	1	2	2	2			1	1	2	2	2	2	2
509	2	67	72	1	2	2	2	2	2			2	1	2				2
510	1	40	48	1	1	1	2	2	2			3	1	2	1	1	1	2
511	1	47	43	1	2	2	2	2	2			2	3	2	1	1	2	2
512	1	19	12	1	2	2	2	2	1			1	1	2	2	2	2	2
513	1	21	66	1	1	2	2	2	2			3	2	2	2	1	2	2
514	2	43	204	1	1	2	1	2	2			2	2	2	1	1	2	2
515	1	28	36	1	1	2	2	2	2			1	2	2	2	1	2	2
516	2	54	36	1	1	2	2	2	2			2	1	1	1	1	2	2
517	1	28	240	1	2	2	2	2	2			1	1	1	2	1	2	2
518	1	50	4	1	1	2	2	2	2			3	3	2	2	1	1	1
519	2	49	36	1	2	2	2	2	2			1	2	2	2	2	2	1
520	1	23	6	1	1	2	2	2	2			3	2	2	1	1	2	2
521	2	21	276	2	1	2	2	2	2			1	2	2	2	2	1	2
522	1	35	36	1	1	2	2	2	1			3	2	2	2	2	2	1
523	1	58	48	1	2	2	1	2	2			2	1	2	1	1	2	2
524	1	31	65	1	2	2	2	2	2			3	2	2	1	2	2	2
525	1	65	48	2	1	2	2	2	2			3	3	2	1	2	2	1
526	1	22	24	1	2	2	2	2	2			1	1	2	2	2	2	2
527	2	42	36	1	1	2	2	2	2			3	1	2	1	1	2	2
528	1	47	8	1	1	2	2	2	2			2	1	2	2	2	2	2
529	1	42	60	1	1	1	2	2	2			1	1	2	2	2	2	2
530	1	34	5	1	2	2	2	2	2			3	3	2	2	1	2	1
531	2	53	120	1	2	2	1	2	2			2	1	2	2	2	2	2
532	1	21	36	1	1	2	2	2	2			3	2	2	2	1	2	2
533	2	79	96	1	2	2	1	2	2			3	2	2	1	2	2	2
534	2	36	12	1	2	2	2	2	2			3	2	2	1	2	2	2
535	1	24	44	1	2	2	2	2	2			3	3	2	2	2	2	2
536	1	23	12	1	1	2	2	2	2			2	2	1	2	2	2	2
537	1	31	45	1	1	2	2	2	2			3	3	2	1	2	1	2
538	1	18	72	1	2	2	2	2	2			3	2	2	2	2	2	2
539	1	38	48	1	1	2	2	2	2			1	2	2	2	1	1	2
540	1	36	8	1	2	1	2	2	2			1	1	2	2	2	2	2
541	1	26	12	1	2	2	2	2	2			3	2	2	1	1	2	2
542	2	49	36	1	2	2	2	2	2			1	2	2	1	1	2	2
543	2	46	36	1	2	2	2	2	2			3	3	2	2	1	2	1
544	2	58	8	1	1	2	2	2	2			1	2	2	2	2	2	2
545	1	20	24	1	2	2	2	2	2			3	2	1	1	2	1	2
546	2	22	36	1	1	2	2	2	2			1	2	1	2	1	1	2
547	1	14	5	1	2	2	2	2	2			1	1	2	2	1	2	1
548	2	22	36	1	1	2	2	2	2			3	2	1	1	2	2	1
549	2	26	84	1	2	2	2	2	2			3	1	2	2	2	1	2
550	2	26	24	1	1	2	2	2	1			2	2	2	2	2	1	2
551	1	35	44	1	1	2	2	2	1			1	1	1	2	1	2	2
552	1	20	18	1	2	1	2	2	2			3	2	1	2	2	2	1
553	1	31	156	1	1	1	1	2	2			1	1	2	2	2	2	2
554	2	19	24	1	2	2	2	2	2			1	2	2	1	2	2	2
555	1	23	72	1	2	2	2	2	2			3	1	1	1	2	2	2
556	2	40	48	1	2	2	2	2	2			3	2	2	2	2	2	2
557	1	30	36	1	1	1	2	2	2			1	1	2	2	1	2	1
558	2	16	144	1	2	2	2	2	2			3	3	2	2	1	1	2
559	2	22	60	1	2	2	2	2	2			3	2	1	1	2	2	2
560	1	46	108	1	2	2	2	2	2			2	1	2	2	2	2	2
561	1	21	24	1	2	2	2	2	2			2	2	2	2	2	2	2
562	1	20	11	1	2	2	2	2	2			1	2	1	2	2	2	2
563	1	13	44	1	2	2	2	2	2			3	1	1	1	1	2	2
564	1	17	36	1	2	2	2	1	2	7	10	3	2	2	2	2	2	2
565	2	16	36	1	2	2	2	2	2			1	1	2	1	1	2	2
566	1	17	84	1	2	2	2	2	2			3	2	2	1	1	2	2
567	2	61	36	1	2	2	2	2	2			2	1	2	2	2	2	2
568	1	34	24	1	2	2	2	2	2			2	2	1	2	2	2	2
569	1	44	72	1	1	2	2	2	2			3	1	2	2	2	2	2
570	2	70	60	1	2	2	2	1	2	22	48	1	2	1	2	2	2	2
571	1	30	3	1	2	2	2	2	2			1	3	2	2	1	2	1
572	1	58	12	1	2	2	2	2	2			2	1	2	1	1	2	2
573	1	33	48	1	2	1	2	2	2			1	2	1	1	1	1	1
574	1	21	4	1	2	2	2	2	2			3	2	1	2	2	2	2
575	1	36	108	1	1	2	1	2	2			3	3	2	2	2	2	1
576	1	14	60	1	2	2	2	2	2			3	2	2	2	2	2	2
577	1	27	45	1	2	2	2	2	2			3	3	2	1	1	1	2
578	2	42	36	1	2	1	2	2	2			2	2	2	2	2	1	2
579	2	20	120	1	2	2	2	2	2			3	2	2	1	1	1	2
580	2	44	72	1	2	2	2	2	2			1	1	2	1	1	2	2
581	2	33	28	1	1	2	2	1	2	8	25	1	2	2	2	1	1	2
582	2	26	96	1	1	2	2	2	1			3	3	2	2	1	2	1
583	2	58	44	1	2	2	2	2	2			1	1	2	1	2	2	2
584	2	52	72	1	2	2	2	1	2	38	14	1	1	2	2	2	2	2
585	2	54	44	1	2	1	2	2	2			1	2	2	1	1	2	2
586	1	26	36	1	1	1	2	2	2			1	1	2	1	1	2	2
587	1	36	12	1	1	2	2	2	1			1	3	2	1	1	1	1
588	1	42	36	1	2	1	2	2	2			1	1	1	2	2	2	2
589	1	21	54	1	2	2	2	2	2			3	3	2	2	2	2	2
590	1	23	48	1	1	2	2	2	2			1	2	2	1	1	2	1
591	2	29	46	1	2	2	2	2	2			1	3	2	2	1	2	2
592	1	14	60	1	1	2	2	2	2			3	3	2	1	1	2	2
593	1	49	36	1	2	2	2	2	2			3	2	2	1	1	2	2
594	2	32	44	1	1	2	2	2	1			1	1	1	2	2	2	2
595	2	27	72	1	2	2	2	2	2			3	3	2	1	1	2	1
596	2	55	36	1	1	2	2	2	2			3	2	2	1	2	2	1
597	1	17	84	1	2	2	2	2	2			1	1	1	2	2	2	2
598	1	62	72	1	2	2	1	2	2			2	1	2	1	1	2	2
599	1	22	132	1	2	2	2	2	2			1	1	1	1	2	2	2
600	1	17	156	1	2	2	2	2	2			3	1	1	2	2	2	2
601	1	29	48	1	1	2	2	2	2			1	2	2	1	1	1	1
602	1	26	108	1	2	2	2	2	2			2	2	1	1	1	1	2
603	2	30	36	1	2	2	2	2	2			3	3	2	2	1	2	2
604	2	45	30	1	2	2	2	2	2			2	1	1	1	1	2	2
605	1	18	120	1	2	2	2	2	2			3	3	2	1	1	2	2
606	2	25	46	1	2	2	2	2	2			2	2	2	2	2	2	1
607	2	27	60	1	2	2	2	2	2			2	2	2	2	2	2	1
608	2	28	60	1	2	2	2	2	2			3	1	1	2	2	2	2
609	1	65	96	1	2	2	1	2	2			1	2	2	2	2	2	1
610	2	45	12	2	2	1	2	2	2			3	1	1	2	2	1	2
611	2	33	96	1	2	2	2	2	2			2	3	2	1	1	2	2
612	1	29	28	1	1	2	2	2	2			3	2	2	1	1	2	1
613	1	54	24	1	1	2	2	2	2			1	1	1	1	2	2	2
614	2	58	12	1	2	2	2	2	2			1	1	2	2	2	2	2
615	2	50	144	1	2	1	1	2	2			3	3	2	2	1	2	1
616	1	30	36	1	1	1	2	2	2			1	1	2	2	2	2	2
617	1	24	60	1	2	2	2	2	2			1	3	2	2	2	2	1
