# Supplementary material for: Prior Appendectomy and the Onset and Course of Crohn's Disease in Chinese Patients
Source: Gastroenterol Res Pract. 2019 Jul 17;2019:8463926. doi: 10.1155/2019/8463926 (PMC6664542; doi:10.1155/2019/8463926)
Supplement: Supplementary Materials — The data of the controls and the data of Crohn's disease patients. [file 8463926.f1.zip › 8463926.f2.xlsx]

## Sheet: Sheet1
Serial number	Sex(1=Male,2=Female)	Age (years)	Nationality (1=Han nationality,2=Minority)	Smoker(1=Yes,2=No)	Drinker(1=Yes,2=No)	NSAIDs(1=Yes,2=No)	Appendectomy (1=Yes,2=No)	Age at appendectomy (years)正确	Interval between appendectomy and CD diagnosis of matched patients (years)
1	2	38	1	2	2	2	2
2	1	56	1	2	1	2	2
3	1	21	1	2	2	2	1	4	17
4	1	58	1	2	1	2	2
5	1	23	1	2	1	2	2
6	1	34	1	2	2	2	2
7	2	12	1	2	2	2	2
8	1	36	1	2	1	2	1	25	11
9	2	23	1	2	2	2	2
10	1	30	1	1	2	2	2
11	2	37	1	2	2	2	1	16	21
12	1	33	1	2	1	2	1	18	15
13	2	6	2	2	2	2	2
14	1	27	1	2	2	2	1	15	12
15	2	21	1	2	2	2	2
16	1	36	1	1	2	2	1	25	11
17	1	33	1	1	2	2	2
18	1	61	1	2	1	2	2
19	2	27	1	2	2	2	1	21	6
20	2	24	1	2	2	2	2
21	2	18	1	2	2	2	1	15	3
22	1	17	1	2	1	2	2
23	2	25	1	1	2	2	2
24	1	72	1	2	1	2	2
25	1	51	1	2	1	2	2
26	1	40	1	2	2	2	2
27	1	30	1	1	2	2	2
28	1	15	1	2	2	2	2
29	1	23	1	1	2	2	2
30	1	16	1	2	2	2	1	8	8
31	2	12	1	2	2	2	2
32	2	36	1	1	2	2	2
33	2	24	1	2	2	2	2
34	2	20	1	2	2	2	1	18	2
35	1	52	1	2	2	2	2
36	2	15	1	2	2	2	2
37	1	20	1	2	2	2	2
38	1	28	1	2	1	2	2
39	1	24	1	1	2	2	2
40	1	19	1	2	2	2	2
41	2	19	1	2	2	2	2
42	2	20	1	2	2	2	2
43	1	13	1	2	2	2	2
44	1	32	1	1	2	2	2
45	2	39	1	1	2	2	2
46	1	18	1	2	2	2	2
47	2	23	1	2	2	2	2
48	1	34	1	2	1	2	2
49	2	49	1	2	1	2	2
50	1	31	1	1	2	2	2
51	2	18	1	2	2	2	2
52	1	31	1	2	2	2	2
53	1	19	1	2	2	2	2
54	1	52	1	2	2	2	2
55	2	50	1	1	2	2	2
56	1	18	1	2	2	2	2
57	2	31	1	2	2	2	2
58	1	21	1	1	2	2	2
59	1	42	1	1	2	2	2
60	1	24	1	1	2	2	2
61	1	44	1	2	2	2	2
62	2	62	1	2	2	2	2
63	1	34	1	2	2	2	2
64	1	20	1	2	1	2	2
65	1	21	1	1	2	2	2
66	2	29	1	1	2	2	2
67	1	34	1	2	1	2	2
68	1	44	1	1	2	2	2
69	1	51	1	2	1	2	2
70	2	50	1	1	2	2	2
71	1	13	1	2	2	2	2
72	2	44	1	2	1	2	2
73	1	28	1	1	2	2	2
74	2	35	1	2	2	2	2
75	1	44	1	2	1	2	2
76	2	55	1	2	2	2	2
77	1	11	1	2	2	2	2
78	1	40	1	2	2	2	2
79	2	16	1	2	2	2	2
80	2	13	1	2	2	2	2
81	1	40	1	2	2	2	2
82	2	44	1	2	2	2	2
83	2	38	1	2	2	2	2
84	2	42	2	2	2	2	2
85	2	51	1	2	1	2	2
86	2	19	1	2	2	2	2
87	1	33	1	1	2	2	2
88	1	35	1	2	2	2	2
89	1	49	1	1	2	2	2
90	1	53	1	2	2	2	2
91	2	51	1	2	2	2	2
92	2	38	1	2	2	2	2
93	1	18	1	2	2	2	2
94	1	27	1	2	2	2	2
95	1	11	1	2	2	2	2
96	2	16	1	2	2	2	2
97	1	25	1	1	2	2	2
98	2	31	1	2	2	2	2
99	1	33	1	1	2	2	2
100	1	25	1	2	2	2	2
101	2	16	1	2	2	2	2
102	1	12	1	2	2	2	2
103	2	52	1	2	2	2	2
104	2	26	1	2	2	2	2
105	1	10	1	2	2	2	2
106	2	49	1	1	2	2	2
107	1	15	1	2	2	2	2
108	1	37	1	1	2	2	1	28	9
109	1	41	1	1	2	2	1	29	12
110	2	59	1	1	2	2	2
111	1	25	1	2	2	2	2
112	2	26	1	2	2	2	2
113	1	56	1	2	1	2	2
114	1	23	1	1	1	2	2
115	1	22	1	2	2	2	2
116	2	60	1	2	2	2	2
117	1	45	1	2	2	2	2
118	2	19	1	2	2	2	2
119	2	18	1	2	2	2	2
120	1	28	1	2	2	2	2
121	1	42	1	1	1	2	2
122	1	53	1	2	1	2	2
123	1	49	1	1	2	2	2
124	1	37	1	1	2	2	1	30	7
125	2	15	2	2	2	2	2
126	2	27	1	2	2	2	2
127	1	24	1	1	2	2	2
128	1	23	1	1	2	2	2
129	2	38	1	2	2	2	2
130	2	40	1	2	2	2	2
131	2	29	1	2	2	2	2
132	2	24	1	2	2	2	2
133	2	18	2	2	2	2	2
134	2	29	1	2	2	2	2
135	1	25	1	2	2	2	2
136	2	18	1	2	2	2	2
137	2	15	1	2	2	2	2
138	1	36	1	1	2	2	2
139	1	15	1	2	2	2	2
140	2	26	2	2	2	2	2
141	2	42	1	2	2	2	2
142	1	70	1	2	2	2	2
143	1	16	1	2	2	2	2
144	2	27	1	2	2	2	2
145	1	10	1	2	2	2	2
146	1	22	1	2	2	2	2
147	1	29	1	1	2	2	2
148	2	15	1	2	2	2	2
149	2	42	1	1	1	2	2
150	1	17	1	2	2	2	2
151	2	60	1	2	2	2	2
152	1	19	2	2	2	2	2
153	2	52	1	2	2	2	2
154	2	20	1	2	2	2	2
155	1	37	1	1	2	2	2
156	1	25	1	2	2	2	2
157	1	51	1	2	2	2	2
158	2	48	1	2	2	2	1	38	10
159	1	17	1	2	2	2	2
160	1	32	1	1	2	2	2
161	1	30	1	1	2	2	2
162	1	22	1	2	2	2	2
163	2	34	1	2	2	2	2
164	1	21	1	1	2	2	2
165	1	43	1	1	1	2	1	30	13
166	1	24	2	1	2	2	2
167	2	57	1	2	2	2	2
168	1	20	1	2	2	2	2
169	2	27	1	1	2	2	2
170	2	34	1	2	2	2	2
171	1	42	1	1	2	2	2
172	2	41	1	1	2	2	2
173	2	38	1	2	2	2	2
174	1	38	1	1	2	2	2
175	1	41	1	1	2	2	2
176	1	10	1	2	2	2	2
177	1	33	1	1	2	2	2
178	1	16	1	2	2	2	2
179	1	18	1	2	2	2	2
180	2	34	1	2	2	2	2
181	2	50	1	1	2	1	2
182	1	43	1	2	1	2	2
183	1	18	1	2	2	2	2
184	1	29	1	2	1	2	2
185	1	23	1	1	2	2	2
186	1	41	2	1	2	2	2
187	2	38	1	2	2	2	2
188	2	57	1	2	2	2	2
189	2	43	1	2	2	2	2
190	2	27	1	2	2	2	2
191	2	31	1	2	2	2	2
192	1	28	1	2	2	2	2
193	1	26	1	2	2	2	2
194	1	57	1	1	1	2	2
195	1	24	1	1	1	2	2
196	1	19	1	2	2	2	2
197	2	44	1	2	1	2	2
198	1	16	1	2	2	2	2
199	1	35	1	2	2	2	2
200	2	54	1	2	2	2	2
201	1	48	1	1	2	2	2
202	1	47	1	2	2	2	2
203	1	22	1	2	2	2	2
204	2	58	1	2	2	2	2
205	1	21	1	1	2	2	2
206	2	40	1	2	2	2	2
207	1	20	1	2	2	2	2
208	1	15	1	2	2	2	2
209	1	27	1	2	2	2	2
210	1	22	1	2	2	2	2
211	2	35	1	2	2	2	2
212	1	28	2	2	2	2	2
213	1	35	1	2	2	1	2
214	1	34	1	2	2	2	2
215	2	18	1	2	2	2	2
216	2	33	1	2	2	2	1	16	17
217	1	66	1	1	2	2	2
218	1	31	1	2	1	2	2
219	1	33	1	1	1	2	2
220	2	39	1	2	1	2	2
221	1	43	1	2	2	1	2
222	1	19	1	2	1	2	2
223	2	47	1	2	2	2	2
224	2	38	1	2	2	2	2
225	2	22	1	2	2	2	2
226	2	43	1	2	2	2	2
227	2	32	1	2	2	2	2
228	2	31	1	2	2	2	2
229	1	41	1	2	1	2	2
230	1	21	1	1	2	2	2
231	1	17	1	2	2	2	2
232	1	32	1	1	2	2	2
233	1	35	1	2	2	2	2
234	1	34	1	2	1	2	2
235	1	11	1	2	2	2	2
236	1	41	1	2	1	2	2
237	1	25	1	2	2	2	2
238	1	50	1	1	1	2	2
239	2	39	1	2	2	1	2
240	1	53	1	2	2	2	2
241	1	24	1	1	2	2	2
242	1	53	1	2	2	1	2
243	1	27	1	2	2	2	2
244	1	32	1	1	2	2	2
245	2	29	1	2	2	2	2
246	1	50	1	1	2	2	2
247	2	18	1	2	2	2	2
248	2	48	1	1	2	1	2
249	1	23	1	1	2	2	2
250	2	22	1	2	2	2	2
251	2	39	1	2	2	2	2
252	2	42	1	1	1	2	2
253	1	28	1	1	2	2	2
254	1	14	1	2	2	2	2
255	1	29	1	1	2	2	2
256	1	24	1	1	2	2	2
257	1	19	1	2	2	2	2
258	1	36	1	1	2	1	2
259	1	14	1	2	2	2	2
260	1	53	1	2	1	2	2
261	1	22	1	2	2	2	2
262	2	12	1	2	2	2	2
263	2	37	1	2	2	2	2
264	1	25	1	2	2	2	2
265	2	58	1	2	2	1	2
266	2	16	1	2	2	2	2
267	1	28	2	2	2	2	2
268	2	41	1	1	2	2	2
269	2	35	1	2	1	2	2
270	1	22	1	2	2	2	2
271	1	21	2	2	2	2	2
272	1	23	1	1	1	2	2
273	1	29	1	1	2	2	2
274	1	18	1	2	1	2	2
275	1	22	2	2	2	2	2
276	2	32	1	2	2	2	2
277	1	26	2	2	2	2	2
278	1	30	1	1	2	2	2
279	1	13	1	2	2	2	2
280	1	14	1	2	2	2	2
281	1	31	1	2	2	2	2
282	1	30	1	1	2	2	2
283	2	46	1	2	2	2	1	39	7
284	1	22	2	2	2	2	2
285	2	34	1	2	2	2	2
286	1	24	1	1	2	2	2
287	1	31	1	2	2	2	2
288	2	40	1	2	2	2	2
289	2	24	1	2	2	2	2
290	2	21	1	2	2	2	2
291	1	51	1	2	2	1	2
292	1	24	1	1	2	2	2
293	1	37	1	2	1	2	2
294	2	13	1	2	2	2	2
295	2	35	2	2	2	2	2
296	2	23	1	2	2	2	2
297	2	48	2	1	2	2	2
298	1	14	1	2	2	2	2
299	2	28	2	1	2	2	2
300	1	31	1	1	1	2	2
301	2	15	1	2	2	2	2
302	1	33	1	1	2	2	2
303	2	28	1	1	2	2	2
304	2	42	1	1	2	2	2
305	1	38	1	2	2	2	2
306	1	25	1	2	1	2	2
307	1	16	1	2	2	2	2
308	1	49	1	2	1	2	2
309	2	50	1	1	2	2	2
310	1	48	1	1	2	2	2
311	1	20	1	2	2	2	2
312	2	54	1	2	2	2	2
313	1	27	1	1	2	2	2
314	1	42	1	1	1	2	2
315	1	28	1	2	1	2	2
316	1	25	1	1	2	2	2
317	1	75	1	2	1	2	2
318	1	41	1	1	2	2	2
319	1	46	1	2	1	2	2
320	1	59	2	2	1	1	2
321	1	33	2	1	2	2	2
322	2	24	2	1	2	2	2
323	1	64	1	2	1	1	2
324	2	42	1	1	2	2	2
325	2	31	1	2	1	2	2
326	1	24	1	1	2	2	2
327	1	16	2	2	2	2	2
328	1	42	1	2	2	2	2
329	2	17	1	2	2	2	2
330	1	24	1	1	2	2	2
331	2	22	1	2	2	2	2
332	1	24	1	2	2	2	2
333	1	29	1	1	2	2	2
334	2	43	1	1	1	2	2
335	2	7	1	2	2	2	2
336	2	59	1	2	1	2	2
337	1	19	1	2	2	2	2
338	1	22	1	1	2	2	2
339	1	24	1	2	1	2	2
340	1	33	1	2	1	2	2
341	1	44	1	2	1	2	2
342	1	62	1	2	2	2	2
343	1	33	1	1	2	2	2
344	1	60	1	2	2	2	2
345	1	57	1	1	2	2	2
346	1	60	1	2	1	2	2
347	1	16	1	1	1	2	2
348	1	16	1	2	2	2	2
349	1	74	1	2	2	2	2
350	2	47	1	2	2	2	2
351	1	50	1	1	2	2	2
352	2	23	1	2	2	2	2
353	2	31	1	2	2	2	2
354	1	27	1	1	2	2	2
355	1	22	1	1	2	2	2
356	1	21	1	2	2	2	2
357	1	28	1	1	2	2	2
358	1	34	1	2	2	2	2
359	1	16	1	2	2	2	2
360	1	19	1	2	2	2	2
361	1	66	1	1	1	1	2
362	1	45	1	1	2	2	2
363	1	43	1	2	2	2	2
364	1	25	1	2	1	2	2
365	2	18	1	2	2	2	2
366	2	20	1	1	2	2	2
367	1	23	1	2	2	2	2
368	1	21	1	1	2	2	2
369	2	39	1	2	1	2	2
370	1	40	1	2	2	2	2
371	1	29	1	1	2	2	2
372	1	19	1	2	2	2	2
373	1	23	1	2	2	2	2
374	1	16	1	2	2	2	2
375	1	59	1	2	1	2	2
376	2	54	1	2	2	2	2
377	1	20	1	1	2	2	2
378	1	22	1	1	2	2	2
379	1	12	1	2	2	2	2
380	2	18	1	2	2	2	2
381	1	59	1	1	1	2	2
382	2	53	1	2	2	2	2
383	2	18	1	1	2	2	2
384	2	21	1	2	2	2	2
385	2	17	1	2	2	2	2
386	2	23	1	2	2	2	2
387	2	24	1	2	2	2	2
388	1	31	1	2	1	2	2
389	2	60	1	2	2	2	2
390	1	21	1	1	2	2	2
391	2	53	1	1	2	2	2
392	1	26	1	2	2	2	2
393	1	26	1	1	1	2	2
394	2	28	1	2	2	2	2
395	1	47	1	2	2	2	2
396	1	19	1	2	2	2	2
397	2	33	1	1	1	2	2
398	1	22	1	1	2	2	2
399	2	76	1	2	2	1	2
400	1	21	1	1	2	2	2
401	1	25	1	2	2	2	2
402	1	15	1	2	2	2	2
403	1	22	1	1	2	2	2
404	1	47	1	2	2	2	2
405	1	22	1	2	2	2	2
406	2	16	1	2	2	2	2
407	1	21	1	2	2	2	2
408	1	23	1	1	1	2	2
409	1	17	1	2	2	2	2
410	1	27	1	2	1	2	2
411	1	28	1	2	1	2	2
412	1	44	1	2	2	2	2
413	1	33	1	1	2	2	2
414	1	34	1	1	2	2	2
415	1	45	1	1	2	2	2
416	1	24	1	2	2	2	2
417	1	29	1	2	1	2	2
418	1	20	1	2	2	2	2
419	1	29	1	1	2	2	2
420	1	62	1	2	1	2	2
421	2	29	1	2	2	2	2
422	1	27	1	1	2	2	2
423	1	70	1	1	1	2	2
424	1	31	1	2	2	2	2
425	2	37	1	2	2	2	2
426	1	19	1	2	2	2	2
427	1	27	1	2	1	2	2
428	1	26	1	2	2	2	2
429	1	30	1	2	2	2	2
430	2	31	1	1	2	2	2
431	1	61	1	2	2	2	2
432	1	19	1	2	2	2	2
433	1	22	1	2	2	2	2
434	1	21	1	2	2	2	2
435	1	33	1	1	2	2	2
436	1	31	1	2	1	2	2
437	2	29	1	1	1	2	2
438	1	61	1	2	2	2	2
439	1	37	1	1	2	2	2
440	2	39	1	2	2	2	2
441	1	55	1	2	2	1	2
442	1	17	1	2	2	2	2
443	1	32	1	1	2	2	2
444	2	14	1	2	2	2	2
445	2	25	1	1	2	2	2
446	1	40	1	2	2	2	2
447	1	28	1	1	2	2	2
448	2	23	1	2	2	2	2
449	1	27	1	1	2	2	2
450	1	49	1	1	2	2	2
451	1	19	1	1	1	2	2
452	1	14	1	2	2	2	2
453	2	35	1	2	2	2	2
454	1	34	1	2	2	2	2
455	1	32	1	2	1	2	2
456	1	23	1	2	2	2	2
457	1	73	1	2	1	2	2
458	1	50	1	1	2	2	2
459	2	16	1	2	2	2	2
460	1	54	1	1	1	2	2
461	2	42	1	1	2	2	2
462	1	40	1	1	2	2	2
463	1	24	1	1	1	2	2
464	2	36	1	2	2	2	2
465	2	22	1	2	2	2	2
466	1	25	1	1	2	2	2
467	2	19	1	2	2	2	2
468	1	44	1	2	2	2	2
469	2	25	1	1	2	2	2
470	1	24	1	2	2	2	2
471	1	17	1	2	2	2	2
472	1	27	1	1	2	2	2
473	1	28	1	1	2	2	2
474	1	23	1	2	2	2	2
475	1	20	1	2	2	2	2
476	2	45	1	2	1	2	2
477	1	39	1	2	2	2	2
478	2	53	1	2	1	2	2
479	2	54	1	1	2	1	2
480	2	57	1	1	2	1	2
481	1	24	1	2	1	2	2
482	2	38	1	1	2	2	2
483	2	36	1	2	2	2	2
484	1	32	1	2	1	2	2
485	1	39	1	2	1	2	2
486	1	20	1	2	2	2	2
487	2	14	1	2	2	2	2
488	1	33	1	2	2	2	2
489	2	11	1	2	2	2	2
490	2	25	1	1	2	2	2
491	2	27	1	2	2	2	2
492	1	36	1	1	2	2	2
493	2	19	1	2	2	2	2
494	1	60	1	1	1	1	2
495	1	20	1	2	2	2	2
496	1	16	1	2	2	2	2
497	1	25	1	2	1	2	2
498	1	31	1	2	2	2	2
499	1	27	1	1	2	2	2
500	1	20	1	2	2	2	2
501	2	56	1	1	2	1	2
502	1	29	2	2	1	2	2
503	1	29	1	2	1	2	2
504	2	24	1	1	2	2	2
505	1	30	1	2	1	2	2
506	1	20	1	2	2	2	2
507	1	21	1	2	2	2	2
508	1	24	1	2	2	2	2
509	2	67	1	2	2	2	2
510	1	40	1	2	2	2	2
511	1	46	1	2	2	2	2
512	1	20	1	2	2	2	2
513	1	20	1	2	2	2	2
514	2	42	1	1	2	2	2
515	1	29	1	1	1	2	2
516	2	54	1	2	2	1	2
517	1	28	1	1	2	2	2
518	1	49	1	2	1	2	2
519	2	49	1	1	2	2	2
520	1	22	1	2	2	2	2
521	2	22	1	2	2	2	2
522	1	36	1	1	1	2	2
523	1	58	1	2	2	2	2
524	1	29	1	2	2	2	2
525	1	67	1	2	1	2	2
526	1	22	1	2	2	2	2
527	2	42	1	1	2	2	2
528	1	47	1	2	2	2	2
529	1	42	1	1	1	2	1	27	15
530	1	34	1	2	2	2	2
531	2	55	1	2	2	2	2
532	1	22	1	2	2	2	2
533	2	78	1	2	2	1	2
534	2	37	1	2	2	2	2
535	1	24	1	2	2	2	2
536	1	25	1	2	2	2	2
537	1	32	1	2	2	2	2
538	1	18	1	1	2	2	2
539	1	38	1	2	1	2	2
540	1	37	1	1	2	1	2
541	1	26	1	2	2	2	2
542	2	49	1	1	2	2	2
543	2	44	1	2	2	2	2
544	2	57	1	2	2	2	2
545	1	21	1	2	2	2	1	13	8
546	2	23	1	2	2	2	2
547	1	12	1	2	2	2	2
548	2	22	1	2	2	2	2
549	2	28	1	2	1	2	2
550	2	26	1	2	2	2	2
551	1	36	1	2	1	2	2
552	1	21	1	2	2	2	2
553	1	32	1	2	1	2	2
554	2	21	1	2	2	2	2
555	1	24	1	2	2	2	2
556	2	40	1	2	2	2	2
557	1	30	1	2	2	2	2
558	2	17	1	2	2	2	2
559	2	22	1	2	2	2	2
560	1	46	1	1	1	2	2
561	1	23	1	1	1	2	2
562	1	21	1	2	2	2	2
563	1	12	1	2	2	2	2
564	1	18	1	2	2	2	2
565	2	16	1	2	2	2	2
566	1	17	1	2	1	2	1	6	11
567	2	62	1	2	2	2	2
568	1	35	1	2	1	2	2
569	1	43	1	2	2	2	2
570	2	71	1	2	2	2	2
571	1	30	1	2	1	2	2
572	1	58	1	2	1	2	2
573	1	32	1	2	1	2	2
574	1	22	1	2	2	2	2
575	1	36	1	1	2	2	2
576	1	15	1	2	2	2	2
577	1	28	1	1	2	2	2
578	2	42	1	1	2	2	2
579	2	19	1	2	2	2	2
580	2	43	1	2	2	2	2
581	2	33	1	2	2	2	2
582	2	26	1	2	2	2	2
583	2	58	1	2	2	1	2
584	2	52	1	2	2	2	2
585	2	55	1	2	2	2	2
586	1	26	1	1	1	2	2
587	1	36	1	2	1	2	2
588	1	42	1	2	2	2	2
589	1	22	1	2	2	2	2
590	1	24	1	2	2	2	2
591	2	29	1	2	2	2	2
592	1	15	1	2	2	2	2
593	1	48	1	1	2	2	2
594	2	34	1	2	2	2	1	24	10
595	2	28	1	2	2	2	2
596	2	55	1	2	2	2	2
597	1	18	1	2	2	2	2
598	1	64	1	1	2	2	2
599	1	22	1	2	2	2	2
600	1	16	1	2	2	2	2
601	1	30	1	2	2	2	2
602	1	27	1	2	2	2	1	21	6
603	2	31	1	2	2	2	2
604	2	45	1	2	1	2	2
605	1	18	1	2	2	2	2
606	2	26	1	2	2	2	2
607	2	26	1	1	2	2	2
608	2	29	1	1	1	2	2
609	1	63	1	2	2	2	2
610	2	44	1	2	2	2	2
611	2	34	1	2	1	2	2
612	1	30	1	2	1	2	2
613	1	54	1	2	2	2	2
614	2	57	1	1	2	2	1	45	12
615	2	50	1	1	2	2	2
616	1	31	1	2	1	2	2
617	1	25	1	2	2	2	2
